# Supplementary material for: Overexpression of GRP78/BiP in P-Glycoprotein-Positive L1210 Cells is Responsible for Altered Response of Cells to Tunicamycin as a Stressor of the Endoplasmic Reticulum
Source: PubMed Central journal article supplement (PMC7226765; doi:10.3390/cells9040890), 2020-04-06
Supplement: cells-09-00890-s001.pdf [file cells-09-00890-s001.pdf]

## GRP78/BiP overexpression in P-glycoprotein-positive L1210 cells is responsible for resistance to tunicamycin-induced endoplasmic reticulum stress

Mário Šereš<sup>1,\*</sup>, Lucia Pavlíková<sup>1</sup>, Viera Boháčová<sup>1</sup>, Tomáš Kyca<sup>1</sup>, Ivana Borovská<sup>1</sup>, Boris Lakatoš<sup>2</sup>, Albert Breier<sup>1,2,\*</sup> and Zdena Sulová<sup>1\*</sup>

<sup>1</sup> Institute of Molecular Physiology and Genetics, Centre of Biosciences, Slovak Academy of Sciences, Dúbravská cesta 9, 84505 Bratislava, Slovakia

<sup>2</sup> Institute of Biochemistry and Microbiology, Faculty of Chemical and Food Technology, Slovak University of Technology in Bratislava, Radlinského 9, 81237 Bratislava, Slovakia.

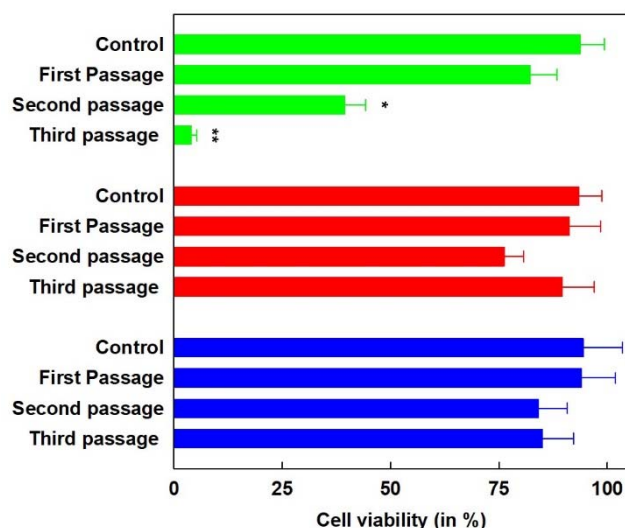

Figure S1. Cell viability of S, R and T cells after 1-3 passage in the presence of tunicamycin (0.1  $\mu$ M) by using both propidium iodide and FITC-annexin V staining. The bars represent the mean  $\pm$  S.E.M. (of three independent measurements) of the percentage of cells that were not stained with either propidium iodide or FITC-annexin V. S cells: green; R cells: red and T cells: blue. Significance: Data differ from control at the levels: \*-P<0.02; \*\*-p<0.01.

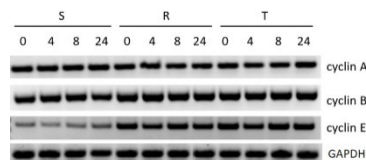

Figure S2. RT-PCR detection of cyclin A, B1 and E expression in S, R and T cells after 0, 4, 8 and 24 hours of incubation in medium containing 0.1  $\mu$ M tunicamycin. GAPDH was used as an internal control. Data are representative of three independent measurements.

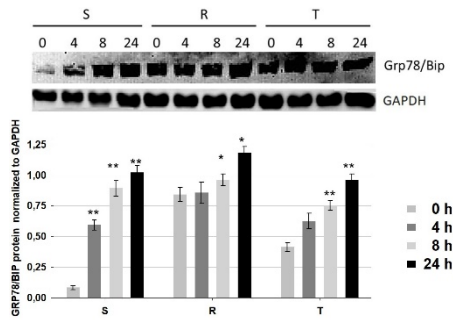

Figure S3. Levels of GRP78/BiP proteins in S, R and T cells after incubation of cells in medium containing 0.1  $\mu$ M tunicamycin for 0, 4, 8 and 24 hours. Data are representative of three independent measurements. Protein bands were quantified by densitometry and data were expressed as means $\pm$ S.E.M from three independent measurements. Significance: Data differ from values obtained in cells that were not incubated in the presence of tunicamycin at the levels: \*-  $p < 0.02$  ; \*\* -  $p < 0.01$ .

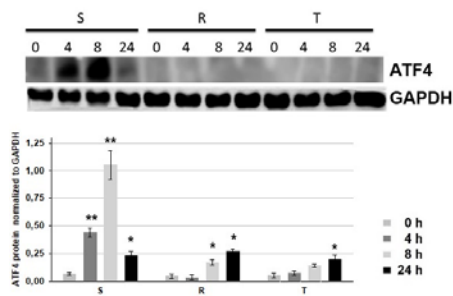

Figure S4. Levels of ATF4 proteins in S, R and T cells after incubation of cells in medium containing 0.1  $\mu$ M tunicamycin for 0, 4, 8 and 24 hours. Data are representative of three independent measurements. Protein bands were quantified by densitometry and data were expressed as means $\pm$ S.E.M from three independent measurements. Significance: Data differ from values obtained in cells that were not incubated in the presence of tunicamycin at the levels: \*-  $p < 0.05$ ; \*\* -  $p < 0.01$ .

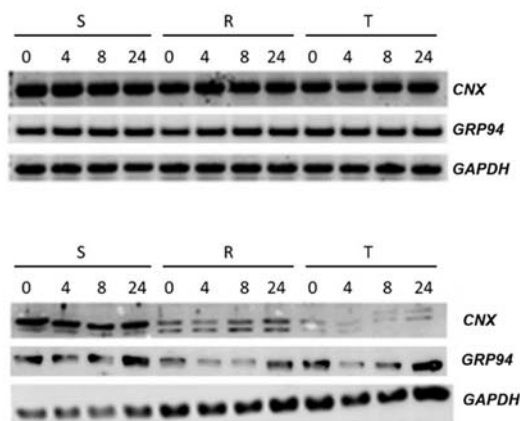

Figure S5. Expression of calnexin and GRP94 using RT-PCR (upper) and Western blotting (lower) in S, R and T cells after incubation of cells in medium containing 0.1  $\mu$ M tunicamycin for 0, 4, 8 and 24 hours. Data are representative of three independent measurements.
